# Supplementary material for: Fate and Transport of Per- and Polyfluoroalkyl Substances (PFAS) at Aqueous Film Forming Foam (AFFF) Discharge Sites: A Review
Source: MDPI journal article supplement (doi:10.3390/soilsystems7020053), 2023-05-26
Supplement: s1 [file s1]

## Supplementary Materials

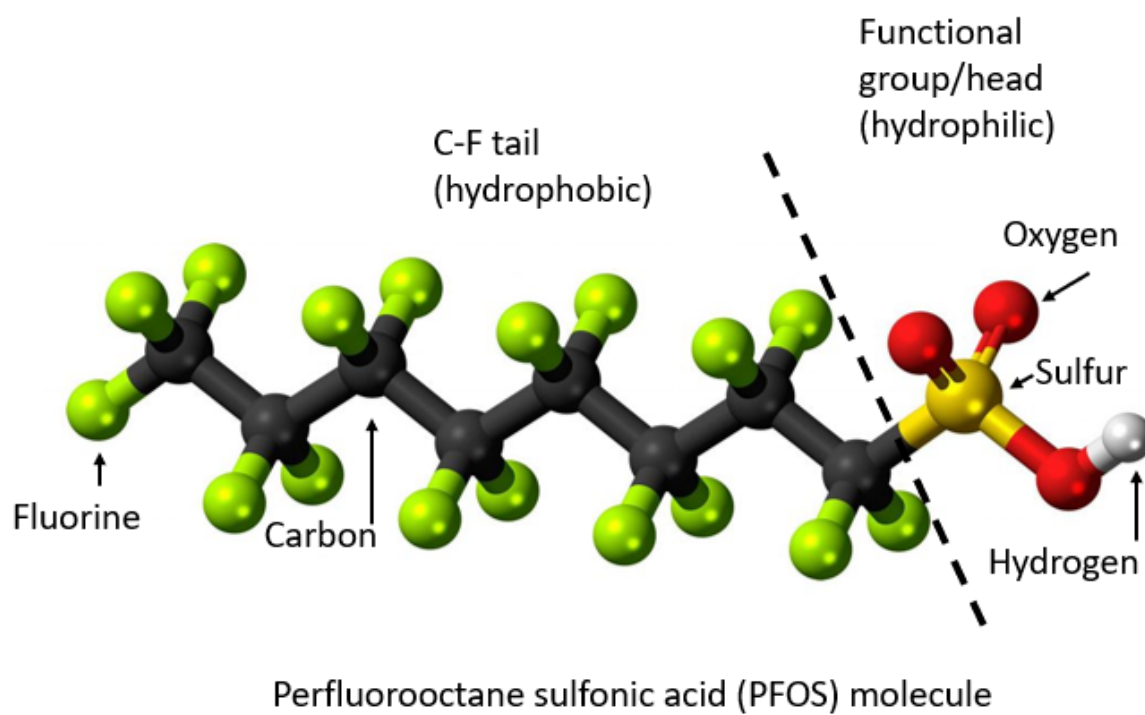

**Figure S1.** Atomic diagram of a PFOS molecule.

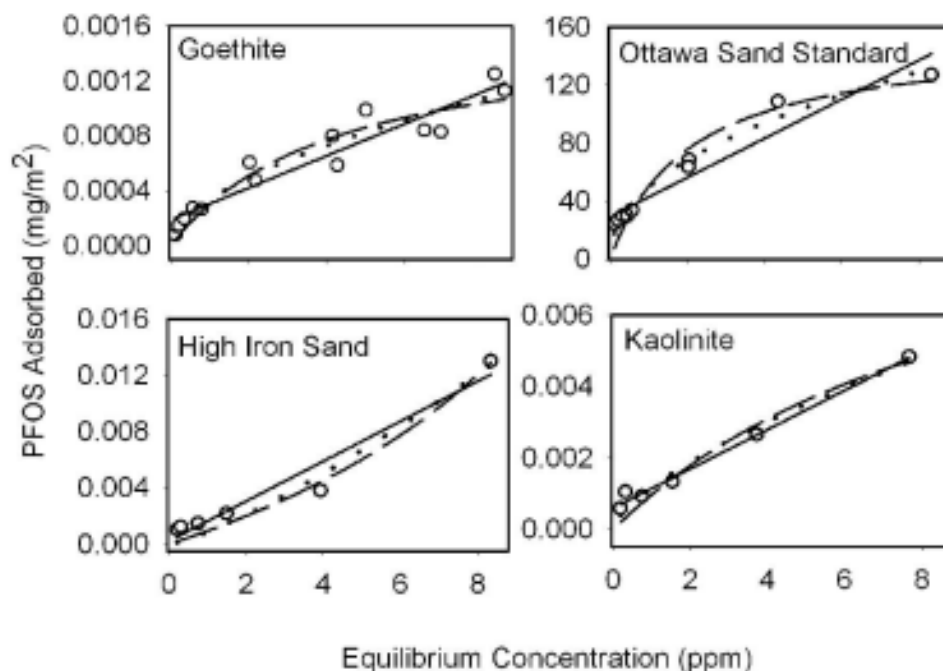

**Figure S2.** Linear, Freundlich, and Langmuir isotherms in PFOS batch sorption experiments for four different sediments. Circles represent collected data, solid lines represent the linear isotherm, dotted lines represent the Freundlich isotherm, and dashed lines represent the Langmuir isotherm. From Johnson et al. (2007). Reprinted with permission of American Chemical Society.

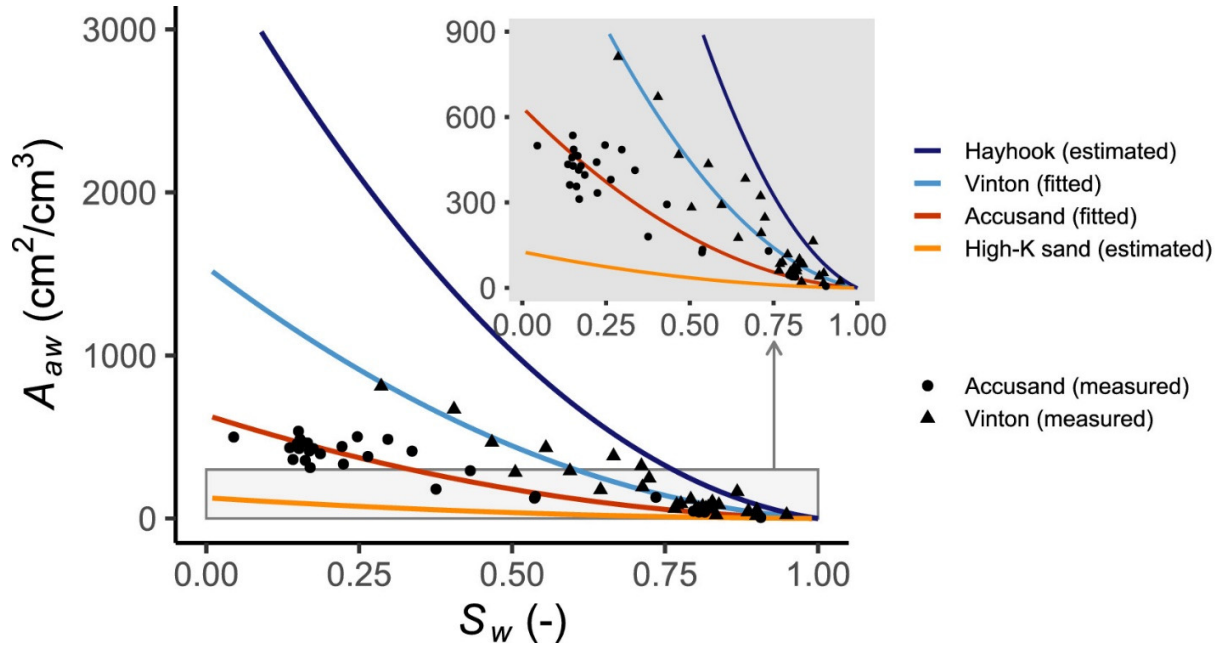

**Figure S3.** Plot of the air-water interfacial area ( $A_{aw}$ ) as a function of water saturation ( $S_w$ ) in four sediments with varying permeability.  $A_{aw}$  is estimated using soil-water content with a combination of equations proposed by Leverett (1941) and the van Genuchten model (1980). From Zeng & Guo (2021). Reprinted with permission of Elsevier.
